# Supplementary material for: S100-EPISPOT: A New Tool to Detect Viable Circulating Melanoma Cells
Source: PubMed Central journal article supplement (PMC6678250; doi:10.3390/cells8070755), 2019-07-20
Supplement: cells-08-00755-s001.pdf [file cells-08-00755-s001.pdf]

**Supplementary Materials:** The following are available online at [www.mdpi.com/xxx/s1](http://www.mdpi.com/xxx/s1).

**Table S1.** Univariate analysis of overall survival in patients with metastatic melanoma using the Kaplan–Meier method.

|                               | <b>n</b>  | <b>Median estimate</b> | <b>IC 95 %</b> |        | <b>p value (Log Rank)</b> |
|-------------------------------|-----------|------------------------|----------------|--------|---------------------------|
| <b>Age, years (median)</b>    | <b>50</b> | .                      | .              | .      | 0.2936                    |
| < 64.50                       | 25        | 6.735                  | 3.483          | 8.674  |                           |
| ≥ 64.50                       | 25        | 6.669                  | 3.745          | 14.324 |                           |
| <b>Sex</b>                    | <b>50</b> | .                      | .              | .      | 0.9791                    |
| Women                         | 26        | 6.719                  | 3.483          | 13.142 |                           |
| Men                           | 24        | 6.702                  | 2.957          | 14.324 |                           |
| <b>Breslow depth (median)</b> | <b>41</b> | .                      | .              | .      | 0.0578                    |
| < 2.90                        | 19        | 8.674                  | 2.957          | 25.166 |                           |
| ≥ 2.90                        | 22        | 4.928                  | 2.497          | 6.735  |                           |
| <b>Clark stage</b>            | <b>30</b> | .                      | .              | .      | 0.0822                    |
| III                           | 5         | 19.680                 | 6.209          | .      |                           |
| IV                            | 20        | 4.419                  | 2.497          | 8.674  |                           |
| V                             | 5         | 6.735                  | 0.493          | 45.372 |                           |
| <b>LDH value</b>              | <b>42</b> | .                      | .              | .      | 0.2699                    |
| 2x > Normal                   | 8         | 2.743                  | 0.066          | 8.509  |                           |
| > Normal                      | 22        | 6.998                  | 3.483          | 14.324 |                           |
| Normal                        | 12        | 6.423                  | 1.873          | 25.166 |                           |
| <b>BRAF mutation</b>          | <b>42</b> | .                      | .              | .      | 0.4112                    |
| No                            | 20        | 4.058                  | 1.676          | 13.503 |                           |
| Yes                           | 22        | 7.573                  | 5.224          | 13.142 |                           |
| <b>Ulceration</b>             | <b>28</b> | .                      | .              | .      | 0.8696                    |
| Absence                       | 15        | 4.632                  | 0.887          | 8.509  |                           |
| Presence                      | 13        | 6.735                  | 3.745          | 13.503 |                           |
| <b>Nb metastatic sites</b>    | <b>49</b> | .                      | .              | .      | 0.8749                    |
| 1                             | 10        | 3.795                  | 0.263          | .      |                           |
| 2                             | 15        | 7.261                  | 2.497          | 16.559 |                           |
| 3                             | 11        | 6.735                  | 2.661          | 16.887 |                           |
| 4                             | 8         | 5.224                  | 0.394          | 19.680 |                           |
| 5                             | 5         | 6.735                  | 0.493          | 13.142 |                           |
| <b>EPISPOT (EPI)</b>          | <b>34</b> | .                      | .              | .      | 0.7416                    |
| < 2 CMCs                      | 19        | 6.637                  | 2.957          | 16.559 |                           |
| ≥ 2 CMCs                      | 15        | 6.209                  | 0.887          | 8.509  |                           |
| <b>CellSearch® (CS)</b>       | <b>37</b> | .                      | .              | .      | <b>0.0006</b>             |
| < 2 CMCs                      | 27        | 7.573                  | 5.224          | 16.559 |                           |
| ≥ 2 CMCs                      | 10        | 3.499                  | 0.066          | 4.600  |                           |
| <b>SYNERGIE EPI/CS</b>        | <b>29</b> | .                      | .              | .      | 0.3419                    |
| EPI and CS < 2                | 14        | 7.655                  | 3.483          | 16.887 |                           |
| EPI and/or CS ≥ 2             | 15        | 4.600                  | 0.493          | 7.885  |                           |
| <b>SYNERGIE EPISPOT/CS</b>    | <b>29</b> | .                      | .              | .      | <b>0.0081</b>             |
| EPI and CS < 2                | 14        | 7.655                  | 3.483          | 16.887 |                           |
| EPI and CS ≥ 2                | 5         | 3.154                  | 0.263          | 4.600  |                           |
| EPI or CS ≥ 2                 | 10        | 7.277                  | 0.066          | 25.166 |                           |

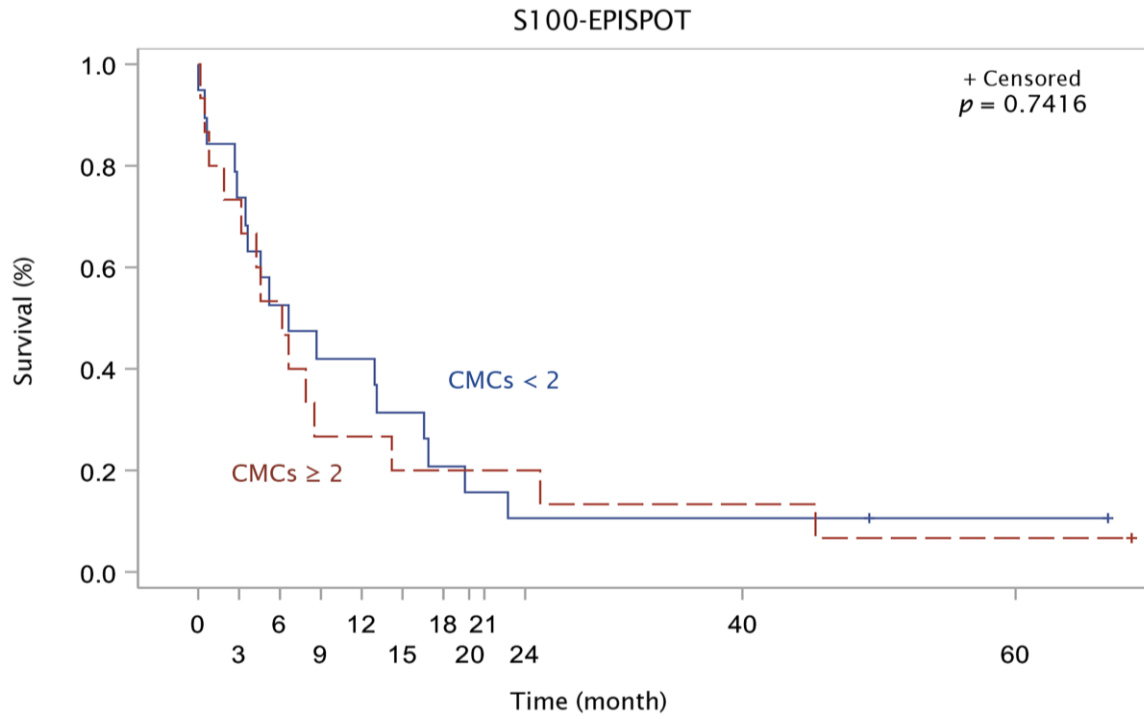

**Figure 1.** Kaplan–Meier survival curves of patients with metastatic melanoma according to the detection cut-off of two CMCs using the S100-EPISPOT (EPI).
